# Supplementary material for: Enantiotropic inconstancy, crystalline solid solutions and co-crystal in the salicylic acid–anthranilic acid system
Source: Royal Society of Chemistry journal article supplement (doi:10.1039/d2cp04200b), 2022-01-01
Supplement: d2cp04200b1.pdf [file d2cp04200b1.pdf]

**Supporting information for  
“Enantiotropic Inconstancy, Crystalline  
Solid Solutions and Co-crystal in the  
Salicylic acid - Anthranilic acid system”**

Fredrik L Nordstrom, Seyed Sepehr Mohajerani , Brian  
Linehan and Francesco Ricci

| X(AA)            | DSC endotherms                       | Low temperature endotherm |                    |                   |                               |                  | High temperature endotherm |                    |                   |                     |                  |
|------------------|--------------------------------------|---------------------------|--------------------|-------------------|-------------------------------|------------------|----------------------------|--------------------|-------------------|---------------------|------------------|
| mol AA/mol SA+AA |                                      | T <sub>inset</sub>        | T <sub>onset</sub> | T <sub>peak</sub> | T <sub>offset</sub>           | Enthalpy         | T <sub>inset</sub>         | T <sub>onset</sub> | T <sub>peak</sub> | T <sub>offset</sub> | Enthalpy         |
|                  |                                      | °C                        | °C                 | °C                | °C                            | J/g              | °C                         | °C                 | °C                | °C                  | J/g              |
| 0.00             | One endotherm                        |                           |                    |                   |                               |                  | 154.07<br>(0.08)           | 158.64<br>(0.006)  | 159.16<br>(0.09)  | 160.98<br>(0.23)    | 189.56<br>(4.21) |
| 0.0109           | One endotherm                        |                           |                    |                   |                               |                  | 153.78<br>(0.23)           | 157.81<br>(0.10)   | 158.72<br>(0.20)  | 160.15<br>(0.58)    | 181.62<br>(1.87) |
| 0.0202           | One endotherm                        |                           |                    |                   |                               |                  | 148.27<br>(1.45)           | 156.63<br>(0.35)   | 158.06<br>(0.18)  | 160.30<br>(0.24)    | 177.85<br>(3.84) |
| 0.0303           | One endotherm                        |                           |                    |                   |                               |                  | 149.82<br>(0.60)           | 156.45<br>(0.09)   | 157.69<br>(0.07)  | 159.17<br>(0.10)    | 172.36<br>(5.32) |
| 0.0381           | One endotherm                        |                           |                    |                   |                               |                  | 145.09<br>(1.27)           | 154.96<br>(0.14)   | 156.94<br>(0.14)  | 159.01<br>(0.11)    | 170.35<br>(4.15) |
| 0.0523           | Two separated endotherms             | 129.72 (0.26)             | 131.24<br>(0.10)   | 132.42<br>(0.01)  | 133.48<br>(0.08)              | 3.81<br>(0.28)   | 144.77<br>(0.47)           | 154.07<br>(0.03)   | 156.41<br>(0.08)  | 158.00<br>(0.10)    | 161.59<br>(6.06) |
| 0.0698           | Two separated endotherms             | 130.09 (0.31)             | 131.82<br>(0.10)   | 132.80<br>(0.05)  | 134.07<br>(0.09)              | 12.85<br>(1.16)  | 144.55<br>(0.79)           | 151.61<br>(1.29)   | 154.86<br>(0.26)  | 156.79<br>(0.33)    | 151.02<br>(8.40) |
| 0.0953           | Two separated endotherms             | 130.64 (0.04)             | 132.12<br>(0.02)   | 133.00<br>(0.03)  | 134.43<br>(0.16)              | 22.94<br>(1.50)  | 138.59<br>(1.45)           | 148.31<br>(0.14)   | 153.04<br>(0.16)  | 155.24<br>(0.41)    | 142.39<br>(3.35) |
| 0.1183           | Two separated endotherms             | 130.20 (0.92)             | 132.11<br>(0.05)   | 132.99<br>(0.07)  | 134.56<br>(0.15)              | 32.96<br>(1.75)  | 138.13<br>(0.34)           | 145.58<br>(0.30)   | 151.45<br>(0.40)  | 154.26<br>(0.68)    | 130.61<br>(5.16) |
| 0.1375           | Two separated endotherms             | 130.41 (0.83)             | 132.21<br>(0.04)   | 133.06<br>(0.05)  | 134.52<br>(0.17)              | 44.73<br>(3.96)  | 135.54<br>(0.16)           | 143.75<br>(0.84)   | 150.16<br>(0.25)  | 153.22<br>(0.77)    | 122.22<br>(5.87) |
| 0.1541           | Two partially overlapping endotherms | 130.38 (0.94)             | 132.11<br>(0.04)   | 133.03<br>(0.06)  | 134.93 <sup>1</sup><br>(0.35) | 53.80<br>(3.73)  |                            | 143.73<br>(1.34)   | 148.90<br>(0.42)  | 152.15<br>(0.88)    | 114.98<br>(7.73) |
| 0.1843           | Two partially overlapping endotherms | 130.83 (0.87)             | 132.30<br>(0.02)   | 133.56<br>(0.16)  | 135.69 <sup>1</sup><br>(0.20) | 76.73<br>(4.68)  |                            |                    | 145.76<br>(1.10)  | 149.79<br>(0.65)    | 78.43<br>(2.19)  |
| 0.2449           | Two partially overlapping endotherms | 130.48 (0.10)             | 132.24<br>(0.02)   | 133.50<br>(0.23)  | 135.23 <sup>1</sup><br>(0.40) | 106.24<br>(2.6)  |                            |                    | 143.78<br>(0.87)  | 146.42<br>(1.02)    | 53.33<br>(5.02)  |
| 0.2853           | Two partially overlapping endotherms | 130.60 (0.58)             | 132.51<br>(0.47)   | 133.54<br>(0.32)  |                               | 144.58<br>(9.83) |                            |                    | 140.34<br>(3.31)  | 143.74<br>(1.06)    | 30.23<br>(15.21) |
| 0.3584           | Two endotherms mostly overlapping    | 130.59 (0.26)             | 132.78<br>(0.12)   | 133.44<br>(0.12)  |                               | 177.18<br>(3.81) |                            |                    |                   | 138.72<br>(0.14)    |                  |
| 0.4043           | One endotherm                        | 131.31 (0.08)             | 133.42<br>(0.72)   | 133.91<br>(0.26)  | 135.93<br>(0.25)              | 149.86<br>(1.33) |                            |                    |                   |                     |                  |
| 0.4404           | One endotherm                        | 129.81 (0.21)             | 132.89<br>(0.80)   | 134.17<br>(0.44)  | 136.07<br>(0.29)              | 176.35           |                            |                    |                   |                     |                  |
| 0.5000           | One endotherm                        | 130.38 (0.40)             | 134.24<br>(0.08)   | 134.67<br>(0.07)  | 136.41<br>(0.27)              | 180.53<br>(2.90) |                            |                    |                   |                     |                  |
| 0.5457           | Two partially                        | 128.92 (0.32)             |                    | 131.66<br>(0.05)  |                               | 16.73<br>(0.23)  |                            | 133.83<br>(0.15)   | 134.65<br>(0.01)  | 136.41<br>(0.09)    | 169.53<br>(1.76) |

<sup>1</sup> Mid-point between endotherms is used as an approximation of the baseline offset temperature of the low-temperature endotherm. This separation also provides the calculation of the enthalpy of both the low- and high-temperature endotherms.

|        |                                      |               |               |               |                            |               |               |               |               |               |               |
|--------|--------------------------------------|---------------|---------------|---------------|----------------------------|---------------|---------------|---------------|---------------|---------------|---------------|
|        | overlapping endotherms               |               |               |               |                            |               |               |               |               |               |               |
| 0.6071 | Two partially overlapping endotherms | 130.20 (0.34) | 131.13 (0.13) | 132.77 (0.24) |                            | 87.81 (9.07)  |               |               | 134.50 (0.15) | 135.67 (0.15) | 53.59 (11.25) |
| 0.6563 | One endotherm                        | 128.76 (0.40) | 131.76 (0.10) | 132.50 (0.27) | 134.96 (0.33)              | 171.36 (3.57) |               |               |               |               |               |
| 0.6996 | One endotherm                        | 130.06 (0.15) | 131.80 (0.26) | 132.52 (0.07) | 134.48 (0.25)              | 172.63 (7.93) |               |               |               |               |               |
| 0.7517 | Two partially overlapping endotherms | 128.76 (0.11) | 131.97 (0.18) | 132.53 (0.15) |                            | 158.55 (5.78) |               |               | 139.21 (0.11) | 139.76 (2.32) | 50.06 (11.81) |
| 0.8002 | Two partially overlapping endotherms | 128.91 (0.89) | 130.51 (0.07) | 132.04 (0.09) |                            | 78.33 (4.76)  |               |               | 137.06 (0.23) | 142.28 (0.17) | 103.78 (6.04) |
| 0.8274 | Two partially overlapping endotherms | 128.28 (0.31) | 130.38 (0.07) | 131.69 (0.05) | 133.34 <sup>1</sup> (0.03) | 51.29 (2.75)  |               |               | 137.28 (0.35) | 141.91 (0.62) | 96.64 (3.29)  |
| 0.8697 | Two separated endotherms             | 129.15 (0.33) | 130.62 (0.16) | 131.55 (0.07) | 132.59 (0.18)              | 5.53 (1.66)   | 133.31 (0.35) | 138.13 (0.43) | 140.69 (0.41) | 143.57 (0.62) | 127.16 (4.28) |
| 0.8796 | Two separated endotherms             | 130.16 (0.52) | 131.12 (0.13) | 131.58 (0.04) | 132.50 (0.37)              | 2.34 (0.89)   | 133.02 (0.27) | 138.15 (0.21) | 140.49 (0.15) | 143.52 (0.43) | 125.43 (3.49) |
| 0.8890 | One endotherm                        |               |               |               |                            |               | 132.64 (0.14) | 139.12 (0.50) | 141.12 (0.37) | 143.71 (0.23) | 132.63 (5.73) |
| 0.9001 | One endotherm                        |               |               |               |                            |               | 133.18 (0.19) | 139.86 (0.58) | 141.75 (0.60) | 143.92 (0.20) | 139.44 (2.22) |
| 0.9492 | One endotherm                        |               |               |               |                            |               | 136.80 (0.18) | 143.00 (0.42) | 144.04 (0.15) | 145.57 (0.14) | 149.79 (1.46) |
| 0.9663 | One endotherm                        |               |               |               |                            |               | 139.40 (0.65) | 144.39 (0.10) | 145.09 (0.09) | 146.47 (0.04) | 154.68 (1.77) |
| 0.9802 | One endotherm                        |               |               |               |                            |               | 140.51 (0.62) | 145.08 (0.14) | 145.68 (0.07) | 147.49 (0.11) | 156.00 (5.35) |
| 1.000  | One endotherm                        |               |               |               |                            |               | 143.81 (0.90) | 146.12 (0.10) | 146.66 (0.05) | 148.50 (0.19) | 163.35 (5.18) |

## Solubility data at 20°C

| Solid phase   | Liquid      | Solid       | Liquid        | Solid         | Conc. of SA     | Conc. of AA     | X(SA)               | A(AA)               | X(solvent)              |
|---------------|-------------|-------------|---------------|---------------|-----------------|-----------------|---------------------|---------------------|-------------------------|
|               | w% AA in SA | w% AA in SA | mol% AA in SA | mol% AA in SA | mg SA/g solvent | mg AA/g solvent | mmol SA/(mol total) | mmol AA/(mol total) | mol solvent/(mol total) |
| SA            | 0%          | 0%          | 0%            | 0%            | 17.23           | 0.00            | 2.7170              | 0.0000              | 0.99728                 |
| $\alpha$      | 4.34%       | 0.40%       | 4.31%         | 0.39%         | 18.63           | 0.84            | 2.9373              | 0.1341              | 0.99693                 |
| $\alpha$      | 4.38%       | 0.25%       | 4.35%         | 0.25%         | 18.18           | 0.83            | 2.8661              | 0.1321              | 0.99700                 |
| $\alpha$      | 6.97%       | 0.63%       | 6.92%         | 0.63%         | 18.70           | 1.40            | 2.9469              | 0.2223              | 0.99683                 |
| $\alpha$      | 12.05%      | 1.14%       | 11.98%        | 1.13%         | 19.34           | 2.44            | 3.0471              | 0.3872              | 0.99657                 |
| $\alpha$      | 20.96%      | 1.74%       | 20.84%        | 1.73%         | 19.60           | 5.20            | 3.0865              | 0.8241              | 0.99609                 |
| $\alpha$ +CC  | 24.67%      | 2.81%       | 24.54%        | 2.79%         | 21.14           | 6.92            | 3.3276              | 1.0975              | 0.99557                 |
| $\alpha$ +CC  | 24.93%      | 5.30%       | 24.80%        | 5.26%         | 21.04           | 6.99            | 3.3127              | 1.1083              | 0.99558                 |
| $\alpha$ +CC  | 24.43%      | 15.85%      | 24.29%        | 15.75%        | 19.60           | 6.33            | 3.0864              | 1.0047              | 0.99591                 |
| $\alpha$ +CC  | 24.98%      | 16.13%      | 24.85%        | 16.03%        | 19.59           | 6.52            | 3.0849              | 1.0346              | 0.99588                 |
| $\alpha$ +CC  | 25.04%      | 30.19%      | 24.90%        | 30.04%        | 20.61           | 6.88            | 3.2449              | 1.0916              | 0.99566                 |
| $\alpha$ +CC  | 25.27%      | 46.19%      | 25.13%        | 46.01%        | 20.10           | 6.80            | 3.1646              | 1.0777              | 0.99576                 |
| CC            | 45.43%      | 51.55%      | 45.25%        | 51.37%        | 10.67           | 8.88            | 1.6815              | 1.4099              | 0.99691                 |
| CC+ $\beta$ I | 80.38%      | 51.66%      | 80.26%        | 51.48%        | 5.37            | 22.00           | 0.8456              | 3.4884              | 0.99567                 |
| CC+ $\beta$ I | 80.66%      | 70.48%      | 80.55%        | 70.33%        | 5.59            | 23.29           | 0.8791              | 3.6924              | 0.99543                 |
| CC+ $\beta$ I | 81.16%      | 80.43%      | 81.05%        | 80.32%        | 5.04            | 21.72           | 0.7938              | 3.4440              | 0.99576                 |
| CC+ $\beta$ I | 81.14%      | 87.59%      | 81.03%        | 87.52%        | 5.16            | 22.18           | 0.8117              | 3.5177              | 0.99567                 |
| CC+ $\beta$ I | 80.27%      | 97.33%      | 80.16%        | 97.32%        | 5.40            | 21.95           | 0.8494              | 3.4807              | 0.99567                 |
| $\beta$ I     | 82.29%      | 99.42%      | 82.18%        | 99.41%        | 4.84            | 0.7622          | 3.5664              | 0.99567             | 0.7622                  |
| $\beta$ I     | 89.33%      | 99.63%      | 89.26%        | 99.62%        | 2.61            | 0.4113          | 3.4682              | 0.99612             | 0.4113                  |
| $\beta$ I     | 94.94%      | 99.55%      | 94.90%        | 99.55%        | 1.09            | 0.1713          | 3.2345              | 0.99659             | 0.1713                  |
| $\beta$ I     | 97.81%      | 99.85%      | 97.79%        | 99.85%        | 0.45            | 0.0711          | 3.1928              | 0.99674             | 0.0711                  |
| $\beta$ I     | 99.08%      | 99.90%      | 99.08%        | 99.90%        | 0.18            | 0.0291          | 3.1728              | 0.99680             | 0.0291                  |
| AA Form I     | 100%        | 100%        | 100%          | 100%          | 0.00            | 0.0000          | 3.1493              | 0.99685             | 0.0000                  |

## Solubility data at 55°C

| Solid phase     | Liquid      | Solid       | Liquid        | Solid         | Conc. of SA     | Conc. of AA     | X(SA)               | A(AA)               | X(solvent)              |
|-----------------|-------------|-------------|---------------|---------------|-----------------|-----------------|---------------------|---------------------|-------------------------|
|                 | w% AA in SA | w% AA in SA | mol% AA in SA | mol% AA in SA | mg SA/g solvent | mg AA/g solvent | mmol SA/(mol total) | mmol AA/(mol total) | mol solvent/(mol total) |
| SA              | 0.00%       | 0.00%       | 0.00%         | 0.00%         | 165.95          | 0.00            | 25.5686             | 0.0000              | 0.97443                 |
| $\alpha$        | 0.58%       | 0.57%       | 0.57%         | 0.57%         | 165.65          | 0.96            | 25.5196             | 0.1491              | 0.97433                 |
| $\alpha$        | 5.15%       | 0.95%       | 5.12%         | 0.94%         | 177.14          | 9.62            | 27.2046             | 1.4888              | 0.97131                 |
| $\alpha$        | 7.53%       | 1.11%       | 7.48%         | 1.10%         | 175.56          | 14.29           | 26.9493             | 2.2092              | 0.97084                 |
| $\alpha$        | 10.15%      | 1.16%       | 10.09%        | 1.15%         | 180.47          | 20.40           | 27.6565             | 3.1480              | 0.96920                 |
| $\alpha$        | 14.62%      | 1.56%       | 14.53%        | 1.55%         | 198.61          | 34.00           | 30.2888             | 5.2220              | 0.96449                 |
| $\alpha$ +CC    | 23.41%      | 5.88%       | 23.28%        | 5.84%         | 227.64          | 69.56           | 34.3753             | 10.5801             | 0.95504                 |
| $\alpha$ +CC    | 22.59%      | 45.70%      | 22.47%        | 45.52%        | 222.18          | 64.85           | 33.6026             | 9.8783              | 0.95652                 |
| CC              | 25.05%      | 49.97%      | 24.92%        | 49.79%        | 210.42          | 70.34           | 31.8549             | 10.7241             | 0.95742                 |
| CC              | 23.79%      | 48.55%      | 23.66%        | 48.37%        | 224.80          | 70.17           | 33.9586             | 10.6763             | 0.95537                 |
| CC              | 40.08%      | 50.17%      | 39.91%        | 49.99%        | 112.30          | 75.12           | 17.2441             | 11.6178             | 0.97114                 |
| CC              | 51.30%      | 50.73%      | 51.12%        | 50.55%        | 82.13           | 86.51           | 12.6474             | 13.4172             | 0.97394                 |
| CC              | 61.71%      | 53.97%      | 61.54%        | 53.79%        | 65.53           | 105.61          | 10.0866             | 16.3736             | 0.97354                 |
| CC+ $\beta$ III | 76.11%      | 59.21%      | 75.98%        | 59.04%        | 54.23           | 172.77          | 8.2765              | 26.5557             | 0.96517                 |
| CC+ $\beta$ III | 77.45%      | 62.48%      | 77.33%        | 62.32%        | 48.96           | 168.17          | 7.4827              | 25.8870             | 0.96663                 |
| CC+ $\beta$ III | 77.55%      | 67.77%      | 77.43%        | 67.62%        | 52.75           | 181.81          | 8.0403              | 27.9133             | 0.96405                 |
| CC+ $\beta$ III | 73.63%      | 83.89%      | 73.49%        | 83.80%        | 59.67           | 166.66          | 9.1078              | 25.6185             | 0.96527                 |
| $\beta$ III     | 80.97%      | 92.72%      | 80.86%        | 92.67%        | 39.83           | 169.44          | 6.0946              | 26.1150             | 0.96779                 |
| $\beta$ III     | 83.40%      | 93.89%      | 83.30%        | 93.84%        | 33.83           | 170.13          | 5.1806              | 26.2424             | 0.96858                 |
| $\beta$ III     | 82.61%      | 94.50%      | 82.50%        | 94.46%        | 33.91           | 161.03          | 5.2002              | 24.8733             | 0.96993                 |
| $\beta$ III     | 83.25%      | 95.14%      | 83.15%        | 95.11%        | 30.92           | 153.67          | 4.7503              | 23.7742             | 0.97148                 |
| $\beta$ III     | 90.23%      | 96.99%      | 90.17%        | 96.97%        | 16.59           | 153.27          | 2.5546              | 23.7660             | 0.97368                 |
| $\beta$ III     | 94.90%      | 98.57%      | 94.87%        | 98.55%        | 8.03            | 149.52          | 1.2387              | 23.2292             | 0.97553                 |
| $\beta$ III     | 98.35%      | 98.64%      | 98.34%        | 98.63%        | 2.45            | 146.34          | 0.3786              | 22.7660             | 0.97686                 |
| $\beta$ III     | 96.81%      | 98.71%      | 96.79%        | 98.70%        | 4.74            | 144.06          | 0.7325              | 22.4107             | 0.97686                 |
| AA Form III     | 100%        | 100%        | 100%          | 100%          | 0.00            | 143.03          | 0.0000              | 22.2707             | 0.97773                 |
